# Supplementary material for: Multimodal deep learning to predict prognosis in adult and pediatric brain tumors
Source: PubMed Central journal article supplement (PMC10060397; doi:10.1038/s43856-023-00276-y), 2023-03-29
Supplement: 43856_2023_276_MOESM2_ESM.pdf [file 43856_2023_276_MOESM2_ESM.pdf]

# Multimodal deep learning to predict prognosis in adult and pediatric brain tumors

Sandra Steyaert<sup>1,\*</sup>, Yeping Lina Qiu<sup>1,2,\*</sup>, Yuanning Zheng<sup>1</sup>, Pritam Mukherjee<sup>1</sup>, Hannes Vogel<sup>3</sup> and Olivier Gevaert<sup>1,4\*\*</sup>

- 1) Stanford Center for Biomedical Informatics Research (BMIR), Department of Medicine, Stanford University, Stanford, CA, USA.
- 2) Department of Electrical Engineering, Stanford University, Stanford, CA, USA.
- 3) Department of Pathology, Stanford University, Stanford, CA, USA.
- 4) Department of Biomedical Data Science, Stanford University, Stanford, CA, USA.

\* These authors contributed equally

\*\* To whom correspondence should be addressed: [ogevaert@stanford.edu](mailto:ogevaert@stanford.edu),  
ORCID: <https://orcid.org/0000-0002-9965-5466>

## Supplementary Information

### Supplementary Figures

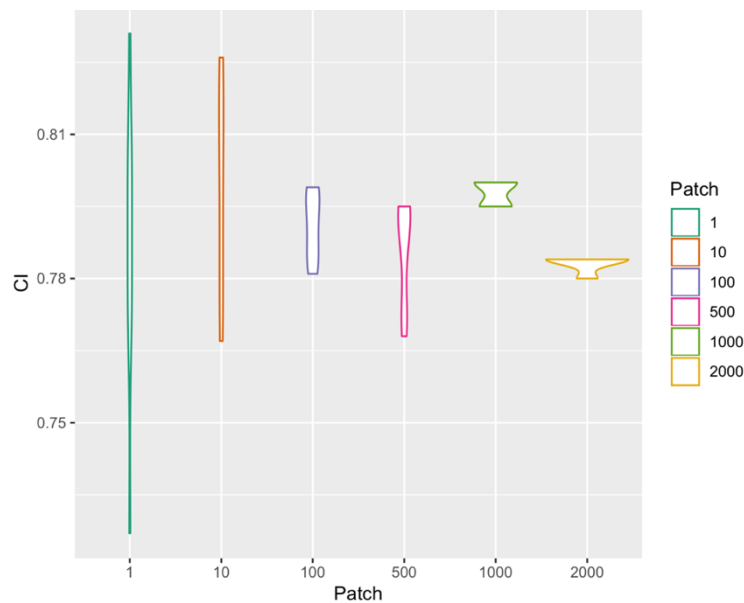

**Supplementary Figure S1:** Average Concordance Index (CI) for 10 training runs using either 1, 10, 100, 500, 1000 or 2000 patches per whole slide image (WSI). Indicated CI are the scores of the models on the test set (N=156).

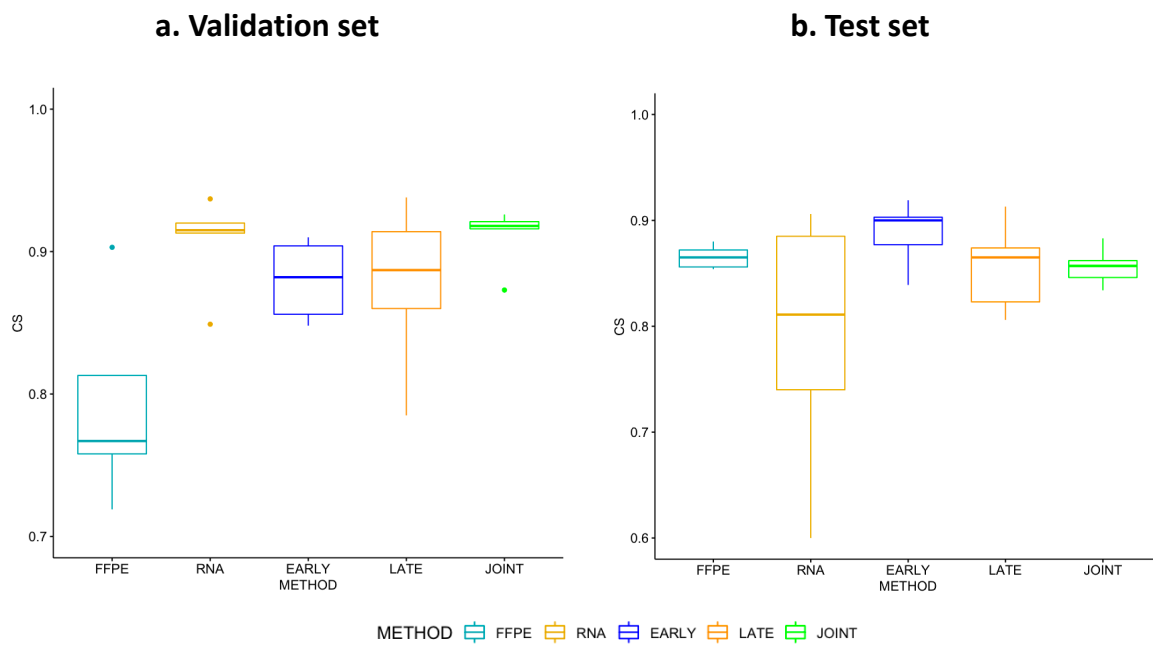

**Supplementary Figure S2: Boxplots of model performance for each model strategy on the pediatric glioma cohort. a** Composite Score (CS) distribution on cross validation (CV) validation sets (N=32). **b** CS distribution of each CV fold on the test set (N=39).

### a. RNA only model

N-GLYCAN TRIMMING AND ELONGATION IN THE CIS GOLGI  
 DISEASES OF BASE EXCISION REPAIR  
 ACTIVATED NTRK3 SIGNALS THROUGH PI3K  
 CHYLOMICRON CLEARANCE  
 NTRK2 ACTIVATES RAC1  
 PTK6 REGULATES PROTEINS INVOLVED IN RNA PROCESSING  
 TRANSPORT OF NUCLEOTIDE SUGARS  
 LRR FLII INTERACTING PROTEIN 1 LRRFIP1 ACTIVATES TYPE 1 IFN PRODUCTION  
 PHOSPHATE BOND HYDROLYSIS BY NTPDASE PROTEINS  
 FIBRONECTIN MATRIX FORMATION  
 FLT3 SIGNALING THROUGH SRC FAMILY KINASES  
 CATION COUPLED CHLORIDE COTRANSPORTERS  
 SIGNALING BY NOTCH1 T 7 9 NOTCH1 M158 K255 TRANSLOCATION MUTANT  
 PHASE 1 INACTIVATION OF FAST NA CHANNELS  
 ACTIVATED NTRK2 SIGNALS THROUGH CDKS

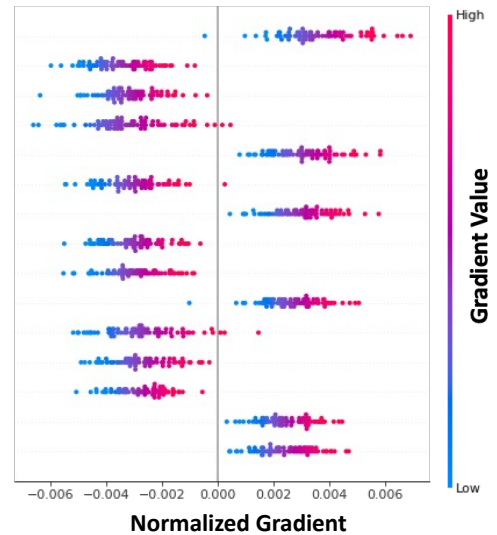

### b. Joint fusion model

PTK6 REGULATES PROTEINS INVOLVED IN RNA PROCESSING  
 RUNX2 REGULATES CHONDROCYTE MATURATION  
 APOBEC3G MEDIATED RESISTANCE TO HIV-1 INFECTION  
 TYSND1 CLEAVES PEROXISOMAL PROTEINS  
 ATTACHMENT OF GPI ANCHOR TO UPAR  
 REACTOME VITAMIN B1 THIAMIN METABOLISM  
 ACTIVATED NTRK2 SIGNALS THROUGH CDK5  
 NR1H2 NR1H3 REGULATE GENE EXPRESSION TO LIMIT CHOLESTEROL UPTAKE  
 MAPK1 ERK2 ACTIVATION  
 N-GLYCAN TRIMMING AND ELONGATION IN THE CIS GOLGI  
 RUNX1 REGULATES TRANSCRIPTION OF GENES INVOLVED IN WNT SIGNALING  
 METABOLISM OF INGESTED SEMET SEC MESEC INTO H2SE  
 RUNX3 REGULATES IMMUNE RESPONSE AND CELL MIGRATION  
 RUNX3 REGULATES BCL2L11 BIM TRANSCRIPTION  
 IKBA VARIANT LEADS TO EDA ID

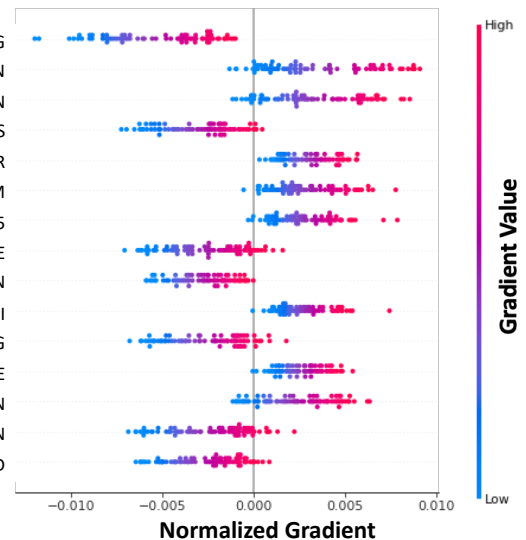

**Supplementary Figure S3: Visualization of pathway importance with respect to survival predictions for the adult The Cancer Genome Atlas (TCGA) cohort.** Pathways are ranked from top to bottom based on the sum of the absolute gradients across all samples. Negative gradients contribute to a lower risk score, while positive gradients lead to a higher risk score. **a** Top 15 pathways of the unimodal gene expression model (RNA only). **b** Top 15 pathways of the multimodal joint fusion model (histopathology + RNA data).

## Supplementary Tables

**Supplementary Table S1: Concordance Index scores (CI) of survival predictions on adult and pediatric glioma cohorts using two single modality models (FFPE & RNA), and three data fusion methods (early, late & joint).** The first two data columns show the results (mean and standard deviation (stdev)) on the cross validation (CV) training and validation sets (10-fold CV for adult and 5-fold CV for pediatric cohort). The last column shows the result of the final model on the test set.

| Cohort    | Strategy        | Model        | Training set CV<br>Mean(CI)<br><i>± stdev</i> | Validation set CV<br>Mean(CI)<br><i>± stdev</i> | Test set<br>CI |
|-----------|-----------------|--------------|-----------------------------------------------|-------------------------------------------------|----------------|
| ADULT     | Single modality | FFPE         | 0.841<br><i>± 0.021</i>                       | 0.764<br><i>± 0.027</i>                         | 0.768          |
|           |                 | RNA          | 0.818<br><i>± 0.032</i>                       | 0.754<br><i>± 0.055</i>                         | 0.710          |
|           | Multimodal      | Early Fusion | 0.841<br><i>± 0.011</i>                       | 0.789<br><i>± 0.020</i>                         | 0.786          |
|           |                 | Late Fusion  | 0.865<br><i>± 0.015</i>                       | 0.797<br><i>± 0.019</i>                         | 0.778          |
|           |                 | Joint Fusion | 0.846<br><i>± 0.035</i>                       | 0.779<br><i>± 0.027</i>                         | 0.788          |
| PEDIATRIC | Single modality | FFPE         | 0.889<br><i>± 0.011</i>                       | 0.795<br><i>± 0.097</i>                         | 0.803          |
|           |                 | RNA          | 0.899<br><i>± 0.065</i>                       | 0.934<br><i>± 0.050</i>                         | 0.860          |
|           | Multimodal      | Early Fusion | 0.912<br><i>± 0.027</i>                       | 0.896<br><i>± 0.059</i>                         | 0.908          |
|           |                 | Late Fusion  | 0.931<br><i>± 0.029</i>                       | 0.905<br><i>± 0.045</i>                         | 0.947          |
|           |                 | Joint Fusion | 0.994<br><i>± 0.001</i>                       | 0.929<br><i>± 0.026</i>                         | 0.912          |

**Supplementary Table S2: Integrated Brier Scores (IBS) of survival predictions on adult and pediatric glioma cohorts using two single modality models (FFPE & RNA), and three data fusion methods (early, late & joint).** The first two data columns show the results (mean and standard deviation (stdev)) on the cross validation (CV) training and validation sets (10-fold CV for adult and 5-fold CV for pediatric cohort). The last column shows the result of the final model on the test set.

| Cohort           | Strategy        | Model        | Training set CV<br>Mean(IBS)<br><i>± stdev</i> | Validation set CV<br>Mean(IBS)<br><i>± stdev</i> | Test set<br>IBS |
|------------------|-----------------|--------------|------------------------------------------------|--------------------------------------------------|-----------------|
| <b>ADULT</b>     | Single modality | FFPE         | 0.092<br><i>± 0.011</i>                        | 0.150<br><i>± 0.015</i>                          | 0.158           |
|                  |                 | RNA          | 0.096<br><i>± 0.012</i>                        | 0.135<br><i>± 0.025</i>                          | 0.151           |
|                  | Multimodal      | Early Fusion | 0.089<br><i>± 0.006</i>                        | 0.127<br><i>± 0.029</i>                          | 0.115           |
|                  |                 | Late Fusion  | 0.082<br><i>± 0.008</i>                        | 0.132<br><i>± 0.025</i>                          | 0.134           |
|                  |                 | Joint Fusion | 0.094<br><i>± 0.017</i>                        | 0.130<br><i>± 0.023</i>                          | 0.144           |
| <b>PEDIATRIC</b> | Single modality | FFPE         | 0.089<br><i>± 0.016</i>                        | 0.212<br><i>± 0.088</i>                          | 0.094           |
|                  |                 | RNA          | 0.099<br><i>± 0.048</i>                        | 0.121<br><i>± 0.039</i>                          | 0.159           |
|                  | Multimodal      | Early Fusion | 0.121<br><i>± 0.047</i>                        | 0.136<br><i>± 0.033</i>                          | 0.070           |
|                  |                 | Late Fusion  | 0.072<br><i>± 0.038</i>                        | 0.151<br><i>± 0.084</i>                          | 0.121           |
|                  |                 | Joint Fusion | 0.031<br><i>± 0.010</i>                        | 0.108<br><i>± 0.032</i>                          | 0.189           |

**Supplementary Table S3: Distribution of different prognostic subtypes of adult glioma based on genetic and diagnostic markers in the poor survival (PS) and good survival (GS) groups of each model.** Values indicate the number of samples of the test set classified by each model in the two risk groups. IDHmut/wt = *IDH1* mutant/wildtype; (no)codel = (no) 1p/19q codeletion. For some samples, the genetic subtype was not known (NA).

| Cohort            | Group      | Subtype                      | FFPE<br>(PS / GS) | RNA<br>(PS / GS) | Early Fusion<br>(PS / GS) | Late Fusion<br>(PS / GS) | Joint Fusion<br>(PS / GS) |
|-------------------|------------|------------------------------|-------------------|------------------|---------------------------|--------------------------|---------------------------|
| ADULT<br>test set | Diagnostic | Glioblastoma                 | 68 / 6            | 56 / 18          | 66 / 8                    | 64 / 10                  | 64 / 10                   |
|                   |            | Astrocytoma anaplastic       | 2 / 22            | 14 / 10          | 10 / 14                   | 12 / 12                  | 11 / 13                   |
|                   |            | Astrocytoma NOS              | 1 / 6             | 1 / 6            | 0 / 7                     | 0 / 7                    | 0 / 7                     |
|                   |            | Oligodendroglioma anaplastic | 2 / 5             | 3 / 4            | 2 / 5                     | 2 / 5                    | 2 / 5                     |
|                   |            | Oligodendroglioma NOS        | 3 / 16            | 0 / 19           | 0 / 19                    | 0 / 19                   | 0 / 19                    |
|                   |            | Mixed Glioma                 | 2 / 23            | 4 / 21           | 0 / 25                    | 0 / 25                   | 1 / 24                    |
|                   | Genetic    | IDHmut-codel                 | 6 / 14            | 1 / 19           | 0 / 20                    | 0 / 20                   | 0 / 20                    |
|                   |            | IDHmut-nocodel               | 2 / 41            | 2 / 41           | 0 / 43                    | 0 / 43                   | 1 / 42                    |
|                   |            | IDHwt                        | 50 / 20           | 59 / 11          | 58 / 12                   | 60 / 10                  | 60 / 10                   |
|                   |            | NA                           | 20 / 3            | 16 / 7           | 20 / 3                    | 18 / 5                   | 19 / 4                    |

**Supplementary Table S4: P-values of Kruskal-Wallis test and post-hoc Dunn Tests (with Benjamini-Hochberg P-value correction).** Multiple pairwise comparisons of Composite Score (CS) on cross validation (CV) validation sets (N=63) (top) and CS distribution of each CV fold on the test set (N=156) for each model strategy (bottom). (\*P-value < 0.05, \*\*P-value < 0.01 and \*\*\*P-value < 0.005)

| Validation sets | <b>Kruskal-Wallis P-value = 0.028* (df=4, chi-squared=10.843)</b>       |                 |                        |                     |                    |
|-----------------|-------------------------------------------------------------------------|-----------------|------------------------|---------------------|--------------------|
|                 | <i>Post-hoc Dunn-test</i>                                               | <b>FFPE</b>     | <b>RNA</b>             | <b>Early Fusion</b> | <b>Late Fusion</b> |
|                 | <b>RNA</b>                                                              | 0.418           | NA                     | NA                  | NA                 |
|                 | <b>Early Fusion</b>                                                     | <b>0.044*</b>   | 0.056                  | NA                  | NA                 |
|                 | <b>Late Fusion</b>                                                      | 0.059           | 0.052                  | 0.425               | NA                 |
|                 | <b>Joint Fusion</b>                                                     | 0.076           | 0.098                  | 0.410               | 0.326              |
| Test set        | <b>Kruskal-Wallis P-value = 2.855e-07*** (df=4, chi-squared=36.038)</b> |                 |                        |                     |                    |
|                 | <i>Post-hoc Dunn-test</i>                                               | <b>FFPE</b>     | <b>RNA</b>             | <b>Early Fusion</b> | <b>Late Fusion</b> |
|                 | <b>RNA</b>                                                              | <b>0.013*</b>   | NA                     | NA                  | NA                 |
|                 | <b>Early Fusion</b>                                                     | <b>0.001***</b> | <b>&lt; 2.2e-16***</b> | NA                  | NA                 |
|                 | <b>Late Fusion</b>                                                      | 0.064           | <b>0.0001***</b>       | 0.065               | NA                 |
|                 | <b>Joint Fusion</b>                                                     | 0.245           | <b>0.002***</b>        | <b>0.008**</b>      | 0.192              |

**Supplementary Table S5: Concordance Index scores (CI) of the developed models on CPTAC, ependymoma and medulloblastoma cohorts.** CPTAC: validation of adult glioma models on external cohort. Ependymoma and medulloblastoma: transfer learning of pediatric glioma models on pediatric brain tumor cohorts from a different origin with less samples.

| <b>Strategy</b> | <b>Model</b> | <b>CPTAC CI</b> | <b>Ependymoma CI</b> | <b>Medulloblastoma CI</b> |
|-----------------|--------------|-----------------|----------------------|---------------------------|
| Single modality | FFPE         | 0.563           | 0.519                | 0.495                     |
|                 | RNA          | 0.563           | 0.630                | 0.617                     |
| Multimodal      | Early Fusion | 0.593           | 0.588                | 0.637                     |
|                 | Late Fusion  | 0.588           | 0.569                | 0.609                     |
|                 | Joint Fusion | 0.571           | 0.615                | 0.696                     |
