# Supplementary material for: Multimodal deep learning to predict prognosis in adult and pediatric brain tumors
Source: PubMed Central journal article supplement (PMC10060397; doi:10.1038/s43856-023-00276-y), 2023-03-29
Supplement: 43856_2023_276_MOESM4_ESM.pdf [file 43856_2023_276_MOESM4_ESM.pdf]

## **Description of Additional Supplementary Files**

**File Name:** Supplementary Data 1

**Description:** Source data
